# Supplementary material
Source: publisher site journal article supplement (https://www.dovepress.com/article/263022)
Supplement: Supplementary file 1 [file get_supplementary_file.php]

**Supplementary file**

Appendix 1, survey available as supplementary material

**General information**

**1.Do you agree to participate?**

Yes

No

**2.Your age in years?**

…………………

**3.Your Gender?**

Male

Female

**4.Region of living?**

Makkah region

Madinah region

Albaha region

Aseer region

Jazan region

Najran region

Tabuk region

Northern region

Aljaof region

Riyadh region

Qassim region

Eastern region

Hael region

**5.Your Education?**

High degrees

University

High school

Intermediate

Primary school

Less than the mentioned

Prefer not to answer

**Current disease status and treatments:**

**6. Which type of cancer you were diagnosed with?**

Breast

Colorectal

Lymphoma

Leukemia

Thyroids

Head and neck

Liver

Pancreatic-biliary

Gastro-esophageal

Kidney

Prostate

Gynecological

Sarcoma

Others

**7.Your cancer stage is?**

Localized stage

Metastatic stage

**8. What treatment(s) you are receiving currently (you can select more than one option)**

Chemotherapy

Immunotherapy

Hormonal therapy

Targeted therapy

Biologic therapy

On follow up only

**This section is related to COVID19 Pandemic**

**9.** **The impact of COVID-19 pandemic on you (you can select more than one option)**

My anti-cancer treatments continued

My anti-cancer treatments stopped or delayed

Unable to attend the clinic due to curfew

Unable to attend due to transportation issues

I have asked to stop or hold treatment

My doctor advised me not to come

I was worried about catching COVOID-19 in the hospital

My family has asked me not to attend

News and social media have impacted me

I was not affected

Others, specify

**10.The source of information for my disease and COVID-19 that I trust, (can select more than one)**

What’s App

Twitter

Instagram

Snap chat

Face Book

Your doctor

TV

Radio

Ministry of Health

Others: please comment

**11.Do you think cancer patients on anti-cancer treatments at higher risk of infection with COVID-19?**

Yes

No

I don’t know

**Preferences for patients during pandemic**

**12.Did your oncologists contact you since the start of COVID-19 Pandemic?**

Yes

No

**13.Which communication methods you prefer during COVID-19 pandemic?** (Strongly Agree, Agree, Neutral, Disagree, Strongly disagree)

**Wen-based patient portal** (a link sent to your mobile phone then access available services)

**Mobile health application** in your mobile or computer (download and access the services)

**Virtual** **clinic** “telemedicine” via videoconference or phone (allow patients and doctors to discuss the care plan in remote locations)

**Text messages**

**Call Center** (direct phone call between doctors and patients)

**Other**, please comment

**14.Do you prefer electronic services in?** (Strongly Agree, Agree, Neutral, Disagree, Strongly disagree)

Delivery of drugs via courier services

Viewing your own blood tests

Viewing and ordering medical reports

Requesting sick leave

Requesting & scheduling appointments

**15.Do you support the notion of digital transformation (the use of new, fast digital technology to enhance patients’ experiences) in caring for cancer patients?**

(Strongly Agree, Agree, Neutral, Disagree, Strongly disagree)

**16.Any other comments?**

………………..

**Thank you**

**End of survey**
